# 1 Spotted lanternfly nymphs use multiple 2 righting behaviors during landing

3  
4 Suzanne Amador Kane<sup>1\*</sup>, Theodore Bien<sup>1</sup>, Luis Contreras-Orendain<sup>1</sup>, Michael F. Ochs<sup>2</sup>, S. Tonia  
5 Hsieh<sup>3</sup>

6 <sup>1</sup> Physics and Astronomy Department, Haverford College, Haverford, Pennsylvania, United  
7 States of America

8 <sup>2</sup> Department of Mathematics and Statistics, The College of New Jersey, Ewing, New Jersey,  
9 United States of America

10 <sup>3</sup> Department of Biology, Temple University, Philadelphia, United States of America

11

12 \* Corresponding author

13 Email: samador@haverford.edu

14

15 **Running title:** Spotted lanternfly nymph righting

16

17 **Summary statement:** High-speed video revealed the unexpected complexity of landing  
18 behaviors used by highly-invasive spotted lanternfly nymphs, providing new insights into a key  
19 step in understanding their dispersal and control.

20

21 **3-6 key words:** spotted lanternfly, righting, landing, anti-predator, falling

22

23

## 24 Abstract

25 Many small animals use aerial righting to mitigate the risks associated with falling, such as  
26 predation, starvation, and desiccation. Spotted lanternflies (*Lycorma delicatula*) (SLFs) are

27 invasive insect pests that often fall from host plants in response to predators or abiotic factors  
28 (e.g., wind). We used high-speed video to study whether immature SLFs (nymphs) impact  
29 surfaces, and subsequently land upright, more often than expected by chance, and, if so, whether  
30 they do so via active or passive mechanisms. SLF nymphs were found to adopt a stereotypical  
31 falling posture proposed to promote passive righting, and similar to those assumed by falling  
32 insects, spiders, geckos, frogs and skydivers. Live SLF nymphs landed upright in more trials  
33 when releasing voluntarily (100%) or when dropped from tweezers (56%) than did dead  
34 specimens (33-35%), with differences being highly statistically significant, even when the dead  
35 specimens were posed in the falling posture. These results support a role for active aerial  
36 righting. The fraction landing upright also did not depend significantly either on orientation  
37 during release or at first impact. We found that significantly more live SLFs reoriented to upright  
38 after impacting in a non-upright orientation via bouncing in combination with adhering to the  
39 substrate with one or more feet. Videos of nymphs landing on leaves confirmed that these insects  
40 can use similar tactics to land upright on host plants. These findings indicate the important role  
41 post-impact righting plays in determining final orientation, and highlight the importance of  
42 studies that include ecologically-relevant substrates and naturalistic conditions.

43

## 44 1. Introduction

45 Falling is a frequent and unavoidable fact of life for animals in a wide range of environments. In  
46 response, many climbing arthropods and arboreal vertebrates have evolved a variety of strategies  
47 to help them land safely, such as gliding (Socha *et al.*, 2015), parachuting, and righting (i.e.,  
48 reorienting so as to land upright) (Jusufi *et al.*, 2011). Although smaller organisms are not at  
49 direct risk from impact-related injury (Haldane, 1985), landing upright can still maximize  
50 survival by minimizing the metabolic cost of terrestrial righting, facilitating predator evasion  
51 (Humphreys and Ruxton, 2019), and mitigating other risks (e.g., hunger, desiccation, habitat and  
52 territory loss, etc.) (Meresman, Ben-Ari and Inbar, 2017). Because dropping is also a strategy  
53 used by animals for dispersal (Nixon, Ludwick and Leskey, 2021) and predator avoidance  
54 (Humphreys and Ruxton, 2019), understanding these behaviors has a wide variety of  
55 implications for ecology, as well as providing inspiration for robotics (Li *et al.*, 2019).

56

57 Among insects and other arthropods, righting behaviors have been categorized into two broad  
58 groups: aerial righting and terrestrial righting (Davis *et al.*, 2011). Aerial righting consists of  
59 body reorientation during the fall, and typically includes an active push off of the surface with  
60 the limbs imparting an initial rotation on the body. Some small arthropods use a stereotypical  
61 falling body posture to take advantage of aerodynamic drag on the body and legs for aerial  
62 righting and even maneuvering during gliding, as found for pea aphids, stick insect instars,  
63 canopy ants and spiders (Jusufi *et al.*, 2011; Yanoviak, Munk and Dudley, 2011, 2015; Ribak *et*  
64 *al.*, 2013). Repositioning of various body parts can also facilitate reorientation to an upright  
65 posture and a controlled landing, ideally with feet in contact with the substrate. Just as some  
66 larger, flexible vertebrates (e.g., cats, rabbits, squirrels, lizards) tend to use a combination of  
67 body, limb, and tail inertia to right themselves while falling (Jusufi *et al.*, 2011), similar  
68 strategies appear to be used among falling stick insect nymphs, which have a relatively flexible  
69 and long body (Zeng *et al.*, 2017).

70

71 On the other hand, terrestrial righting consists of determining how an animal that is on its back  
72 can get back onto its feet. Among insects, this usually involves a period of pushing off of the  
73 substrate using a combination of legs, wings, and the body imparting a rocking motion on the  
74 body until a leg can gain enough purchase to complete an upright flip, as observed in locusts and  
75 cockroaches (Faisal and Matheson, 2001; Li *et al.*, 2019; Zhang *et al.*, 2021).

76

77 We elected to study falling and righting in the spotted lanternfly (*Lycorma delicatula*) (SLF), a  
78 phloem-feeding planthopper native to China and south Asia that has become a major invasive  
79 pest threatening agriculture and forestry in the US since its introduction in 2014 (Dara, Barringer  
80 and Arthurs, 2015), making research that can inform the development of more effective traps and  
81 other deterrents particularly urgent (Francese *et al.*, 2020). The spotted lanternfly undergoes a  
82 rapid lifecycle, quadrupling in length (Dara, Barringer and Arthurs, 2015) and progressing  
83 through four wingless nymphal stages (instars) in three to four months before emerging as a  
84 winged adult (Lee, Park and Leskey, 2019). (Fig. 1A,B) Although nymphs and adults are able to  
85 cling securely to leaflets, stems, branches and other surfaces using a combination of tarsal claws  
86 and adhesive pads (arolia) (Frantsevich *et al.*, 2008; Avanesyan, Mangel and Lamp, 2019), they  
87 frequently drop out of trees and climb back into the canopy of the same or nearby trees in

88 response to obstacles, wind, or predator attack (Kim *et al.*, 2011). In light of their rapid growth,  
89 the metabolic cost of frequent climbing and interruptions in time spent feeding likely impose  
90 significant fitness costs. This raises the question of whether falling SLF nymphs are able to land  
91 securely on lower leaves of their host plant. The SLF's preferred host, the *Ailanthus altissima*  
92 tree, has dense layered foliage consisting of pinnately compound leaflets (Fig. 1C, D) that likely  
93 offer numerous landing targets for falling insects. Our observations indicate that SLFs that either  
94 drop or jump often land on underlying or neighboring plants. Consistent with this, capture-mark-  
95 recapture studies have shown that SLFs frequently remain on or nearby a healthy host *A.*  
96 *altissima* tree (Cooperband *et al.*, 2019). We therefore hypothesized that this species should  
97 exhibit righting during dropping onto leaves and the ground. As far as we are aware,  
98 biomechanical studies of SLF nymphs have measured their walking, jumping and climbing  
99 ranges and rates, not their behavior during dropping or their righting capabilities (Jung *et al.*,  
100 2016; Nixon, Ludwick and Leskey, 2021).

101

102 In this study, we addressed the following research questions via a series of laboratory  
103 experiments on SLF fourth instar nymphs. First, we sought to quantify whether spotted  
104 lanternfly nymphs indeed do self-right more often than expected by chance when dropped. Once  
105 confirmed, we examined the strategies they used for righting and landing in general. Finally, we  
106 asked whether these righting behaviors influence their ability to land on lower layers of foliage,  
107 to avoid completely falling out of the tree.

108

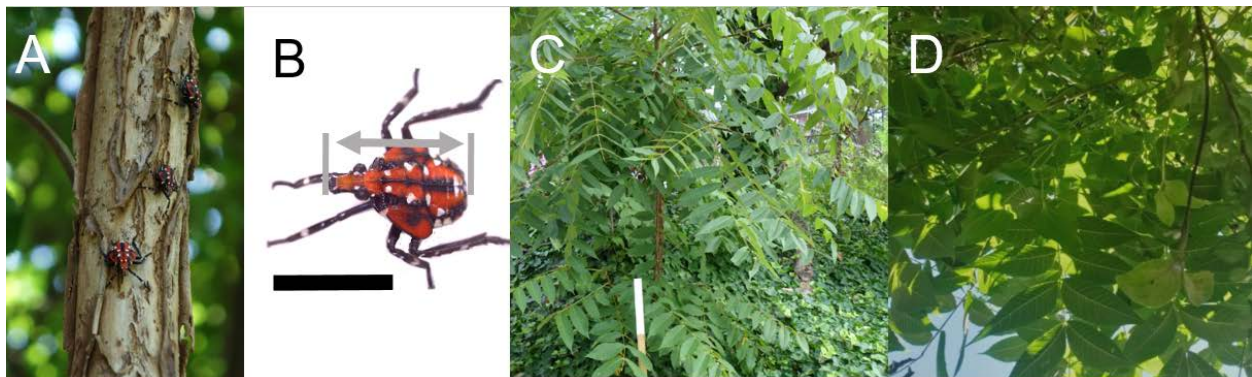

109

110 Figure 1. A) Fourth instar spotted lanternfly nymphs on a trunk. B) Close-up of a fourth instar  
111 spotted lanternfly nymph showing our definition of body length (gray arrow) (black line = 10  
112 mm scale bar). Photographs of the spotted lanternfly's preferred native host tree, *A. altissima*,

113 showing (C) the release distance (white bar = 200 mm) used in most experiments in this study  
114 and (D) a view from the ground looking upward into the canopy, showing how the densely  
115 overlapping leaflets offer many landing opportunities for falling nymphs.

116

## 117 2. Methods

118 Live, fourth instar spotted lanternfly nymphs were collected and studied within a quarantine zone  
119 in southeastern Pennsylvania, US (40.006525, -75.256714) in July-August 2020. All experiments  
120 were performed indoors in still air at  $24 \pm 3$  deg C. Nymphs were collected by hand or using an  
121 insect net and scoop-shaped forceps from natural habitats, primarily *A. altissima* trees. Only  
122 intact, healthy, and active insects were studied. Fourth instar nymphs were identified by their  
123 distinctive red, black and white coloration. (Figs. 1A, 2A) Specimens not immediately used in  
124 experiments were stored in a sealed container with freshly picked *A. altissima* foliage and wet  
125 tissues. Insects maintained in this way retained their normal levels of activity for at least 48  
126 hours. Because this species is the subject of an eradication program (Urban, 2020), all  
127 specimens were euthanized by freezing after experimentation. For studies of dead specimens, we  
128 used frozen insects that were thawed and either used within 30 min of thawing or stored in 49%  
129 relative humidity chambers to avoid desiccation and to preserve their native biomechanical  
130 properties (Reichel, Labisch and Dirks, 2019). Specimen body length,  $L = 11.8$  mm [10.3, 12.6]  
131 mm (mean, range) (Fig. 1B) was measured to  $\pm 0.05$  mm either using digital calipers (model SV-  
132 03-150, E-base Measuring Tools, Yunlin, Taiwan) or using the *measure* function in ImageJ  
133 (Schneider, Rasband and Eliceiri, 2012) on digital photographs including a mm-ruled scale.  
134 Body masses,  $m = 66 \pm 18$  mg, [40, 100] mg (N = 16, mean  $\pm$  s.d., range), were measured to  $\pm$   
135 0.4 mg with an analytical balance (Explorer, Ohaus, Parsippany, NJ US). (See Table S1 for  
136 morphometric data).

137

### 138 2.1 Video studies of dropping and landing experiments

139 We performed a variety of experiments on SLF nymphs filmed during dropping to determine  
140 their midair body motions and center of mass trajectories while falling and their landing  
141 behavior. Most high-speed videos of spotted lanternfly specimens were filmed using an SA-3  
142 high-speed camera (Photron, Tokyo, Japan) (monochrome,  $1024 \times 1024$  pixel resolution, 1000

143 frames/s; exposure 500 microsec) illuminated by a Nila Zaila LED light (Nila, Inc. Altadena,  
144 CA). For filming SLFs releasing voluntarily from surfaces and falling on leaves, we used a color  
145 Chronos 1.4 camera at a higher frame rate ( $800 \times 600$  pixels, 2837 fps; exposure 343 microsec,  
146 Krontech, Burnaby, BC, Canada) and LED light source (SL-200W, Godox, Shenzhen, China). A  
147 second perspective was provided by a mirror included in the field of view to allow visualization  
148 of body pose and rotational behavior.

149

150 Dropping experiments were performed on live specimens and on dead SLF nymphs with their  
151 legs contracted close to the body (“dead/tucked”). An additional set of dead nymphs  
152 (“dead/spread”) were pinned with their legs spread and fixed with a small drop of cyanoacrylate  
153 glue applied using a fine needle to each leg joint (total added mass  $1.0 \pm 0.2$  mg; 1-2% body  
154 mass), so as to position the forelegs above the dorsal plane to approximate the posture we  
155 observed for SLFs, which was similar to those reported for falling pea aphids (Ribak *et al.*,  
156 2013). Glue was applied so as to avoid coating the feet, which still adhered to substrates after  
157 being glued. Following previous studies (Ribak *et al.*, 2013; Zeng *et al.*, 2015; Meresman, Ben-  
158 Ari and Inbar, 2017), we released specimens with the goal of achieving low initial speed and spin  
159 while controlling initial falling orientation. Live and dead specimens were released using  
160 featherweight entomology tweezers (DRENTF01, DR Instruments, Palos Hills, IL US) (Fig. 2A)  
161 oriented side, head down or caudal end down, similar to methods used in (Ribak *et al.*, 2013;  
162 Meresman *et al.*, 2014). To release specimens upright or upside-down, we grasped them initially  
163 with fingers on the sides of the scutellum. If a nymph responded to handling by feigning death, it  
164 was breathed on until it spread its legs and moved actively. All specimens were inspected after  
165 manipulation during experiments and showed no effect of handling. Live specimens sometimes  
166 were measured in a second session after being marked in one or two places with white paint ( $0.9$   
167  $\pm 0.2$  mg; 1-2% body mass); this added mass is unlikely to influence specimen motility given  
168 that heavier (6.5% body mass) harmonic radar tags do not significantly affect SLF fourth instar  
169 nymph walking, climbing, jumping or survivorship (Jung *et al.*, 2016). While we tried to achieve  
170 a balanced study design, the tendency of this species to fatigue rapidly limited our ability to  
171 conduct a uniform number of trials on each specimen.

172

173 Specimens were dropped artificially (i.e., either from tweezers or manually) from a uniform  
174 height of 200 mm, approximately 17 body lengths, measured using a nearby vertical ruler.  
175 Preliminary tests established that this range was high enough for a large fraction of specimens to  
176 land upright. This height allowed comparison with previous research on righting by pea aphids  
177 that used a similar range of heights (Ribak *et al.*, 2013) and by stick insect nymphs (Zeng *et al.*,  
178 2017), which self-righted aerially over a similar height in terms of body lengths. We also note  
179 that this choice of falling distance lies in the range of distances between neighboring leaflets in  
180 *A. altissima* trees. (Fig. 1C)

181  
182 For video studies, specimens fell onto one of two landing substrates: 1) a hard, horizontal surface  
183 covered with white, art-quality watercolor paper; 2) a freshly-harvested, freely-suspended *A.*  
184 *altissima* leaf taped to a post such that the surfaces of its freely-suspended leaflets were inclined  
185 by [0,30] deg relative to horizontal. SLF nymphs were observed to be able to achieve a secure  
186 footing by using their tarsal claws and arolia on both hard and leaf substrates. Because it was  
187 difficult to achieve a reproducible impact location on the leaflets, the leaf substrate experiments  
188 provided insight only into impact and post-impact behaviors that resulted in a successful landing.

189  
190 To study whether SLF nymphs able to launch voluntarily from surfaces exhibited different  
191 behaviors during falling and landing, we also filmed SLF nymphs that were stimulated to release  
192 from the wall of a clear acrylic box by moving a plastic insect toward them or gently breathing  
193 on them—a trigger we observed to elicit dropping behavior in the field. Because of the known  
194 tendency of these insects to climb (Nixon, Ludwick and Leskey, 2021), we were unable to  
195 control the drop distance in these trials to agree with that used for the artificially released  
196 specimens.

197

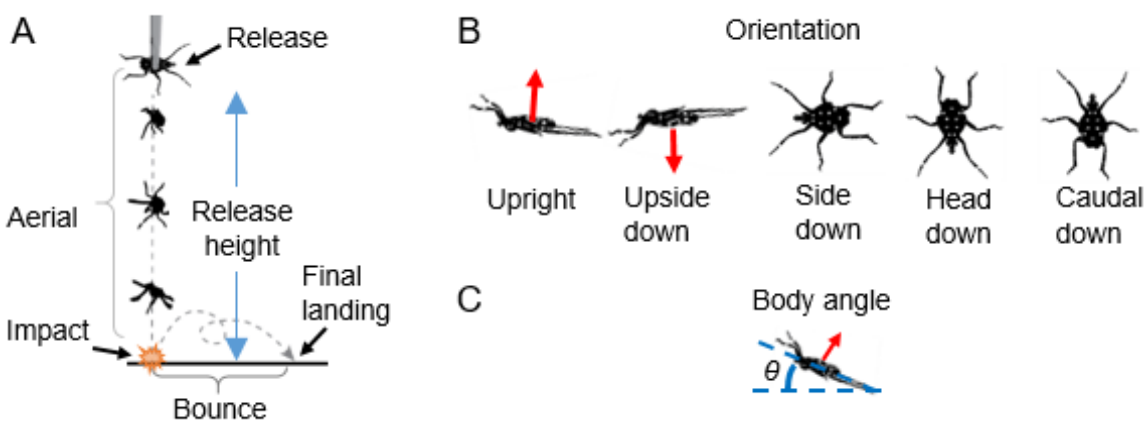

198  
199 Figure 2. A) Schematic of the dropping experiment, showing how the five different phases of  
200 motion used to analyze the outcomes were defined. B) Illustration of the five orientations used to  
201 describe releases, impacts and final landings. (Red arrows indicate dorsoventral axis.) C)  
202 Geometry used to define the cranial-caudal body axis angle,  $\theta$ , relative to horizontal.

203  
204 We divided each falling trial into four periods for analysis: aerial, impact, post-impact, and final  
205 landing. (Fig. 2A) Specimen orientation at initial impact and final landing (i.e., after coming to  
206 rest post-impact) was scored by frame-by-frame video analysis into the best agreement with five  
207 categories similar to definitions used in (Ribak *et al.*, 2013). (Fig. 2B) In the following, a body  
208 axis is referred to as “horizontal” and “vertical” when it agrees with the respective direction  
209 within 45 deg; e.g., a horizontal cranial-caudal axis corresponds to  $\theta \leq \pm 45$  deg. (Fig. 2C) With  
210 this convention, specimens oriented “upright” or “upside-down” had their dorsal or ventral side  
211 uppermost, respectively, and horizontal cranial-caudal and medio-lateral axes. The “side”  
212 orientation had a horizontal cranial-caudal angle and vertical medio-lateral axis with the left side  
213 oriented downward, while the “head” and “caudal” orientations had a vertical cranial-caudal axis  
214 and the head or caudal side oriented downward, respectively. We also recorded whether the  
215 nymphs bounced during landing, defined as vertical motion of the body center of mass after  
216 impact in which at least two feet lost contact with the ground.

## 217 218 2.2 Image analysis

219 Videos were analyzed using custom image analysis code written in MATLAB v2020A with the  
220 machine vision and curve fitting toolboxes (Mathworks, Natick MA) (Supplemental Materials);



221 all italicized functions referenced below are from MATLAB unless noted otherwise. The  
222 MATLAB camera calibrator was used to calibrate and correct each camera for lens distortion  
223 before analysis (mean reprojection error:  $\leq 0.3$  pixel). The spatial calibration was measured from  
224 images of a ruler at the same distance as the specimen (range [1.7, 5.8] pixel/mm), and checked  
225 using known body dimensions. The maximum bounce height (defined as the difference between  
226 the body midpoint at the lowest and highest heights immediately after impact) was measured  
227 manually using ImageJ (Schneider, Rasband and Eliceiri, 2012). For automated tracking of  
228 specimens, all images were blurred using a Gaussian filter using *imgaussfilt* with sigma of 0.6  
229 mm to reduce noise. To isolate the specimen's image from background, we then computed a  
230 background image by taking the median intensity of the video using *median2*, and subtracted this  
231 background image from each video frame using *imabsdiff* to compute the absolute difference  
232 between the two images. The difference image was contrast-enhanced using *adapthisteq* to  
233 correct for nonuniform illumination, and thresholded using *imbinarize* to create a binary image  
234 of a white specimen on a black background. If necessary, the morphological command *imclose*  
235 was used to fill in holes on the specimen due to white spots. For tracking and determining body  
236 orientation, the resulting binary image was processed using the morphological operation *imopen*  
237 (a dilation followed by an erosion over approximately 1.5 mm) to remove the legs, after which  
238 *regionprops* was used to compute the body centroid ( $x, y$ ) and an ellipse that has the same  
239 normalized second central moments as the body. The orientation angle,  $\theta$ , of the body (i.e., the  
240 angle of the cranial-caudal axis relative to horizontal) was tracked using a combination of the  
241 orientation of the body ellipse's major axis and the angle at which the distance between the  
242 body's outline and its centroid is at a maximum due to the protruding head.

243

### 244 2.3 Statistical methods and data analysis

245 The statistical analysis of data was performed with R v3.6.3 (R Core Team, 2017). Outcomes for  
246 experiments were analyzed using Fisher's exact tests or  $\chi^2$  tests. Where Fisher's exact test  
247 sample size exceeded computing capacity, simulated p-values were generated from 2000  
248 simulations. All results are reported as mean [95% C.I.] unless noted otherwise. ANOVA with  
249 Tukey's Honest Significant Differences (HSD) was used to determine p-values between different  
250 conditions for kinematics measures such as speeds and bounce heights. Data and code required  
251 to reproduce all results are included in the Supplementary Materials.

252

253 The coordinate data from video tracking were analyzed without further processing using  
254 nonlinear least squares fitting in MATLAB. The vertical falling trajectory ( $y$  vs time,  $t$ ), was fit  
255 to the equation of motion for the case of a drag force quadratic in speed:

$$256 \quad y(t) = \frac{v_{ter}^2}{g} \ln \left( \cosh \left( \frac{gt}{v_{ter}} \right) \right) \quad (1)$$

257 where  $v_{ter}$  is terminal speed and  $g = 9.81 \text{ m/s}^2$  is the acceleration of gravity. The horizontal data  
258 ( $x$  vs  $t$ ) were fit to a quartic polynomial (the lowest order polynomial found to result in mean fit  
259 residuals  $< 0.8 \text{ mm}$ ). Goodness-of-fit was assessed using  $R^2$  and residuals analysis. The speed  
260 before impact,  $v_{imp}$ , and terminal speed,  $v_{ter}$  were determined from fit parameters, and then used  
261 to compute Reynolds number,  $Re = L v / \nu$ , where  $L$  = body length and the kinematic viscosity of  
262 air,  $\nu = 15.34 \times 10^{-6} \text{ m}^2/\text{s}$  (Ellington, 1991), as well as the fractional collisional energy loss on  
263 impact,  $e_{col} = 1 - (\text{gravitational potential energy})/(\text{kinetic energy at impact}) = 1 - 2gh/v_{imp}^2$ ,  
264 where  $h$  = maximum bounce height after impact.

265

266 We were also interested in measuring whether the rotation rate of the specimen about the normal  
267 to the image plane varied during the fall. This quantity is relevant because conservation of  
268 angular momentum dictates that the rotation rate about any given axis is constant for constant  
269 specimen rotational inertia and zero net torque along that direction (Kleppner and Kolenkow,  
270 2014). Consequently, in order for its rotation rate to vary throughout the fall, the specimen must  
271 either experience nonzero torque due to aerodynamic drag or move its legs so as to vary  
272 rotational inertia. Using MATLAB, we manually measured the specimen's average aerial  
273 rotation rate,  $\Omega = \Delta\theta/\Delta t$ , from the change in the body angle on the image,  $\Delta\theta$ , between two  
274 frames recorded  $\Delta t = 25 \text{ ms}$  apart. The associated measurement uncertainty was determined from  
275 the error in determining the initial and final orientations of the specimen's cranial-caudal axis on  
276 video. The initial rotation rate,  $\Omega_{rel}$ , was measured shortly (50 ms) after release, to ensure that the  
277 specimen was clear of the tweezers or wall. To determine if  $\Omega$  varied throughout the fall, the  
278 rotation rate also was measured at the approximate midpoint of the fall (125 ms after release),  
279  $\Omega_{mid}$ , and immediately before impact,  $\Omega_{imp}$ .

280

## 281 3. Results

### 282 3.1 Effect of orientation at release on landing

283 We analyzed high-speed video of falling and landing on hard surfaces for five trials for each of  
284 five release orientations from tweezers for five different live SLF nymphs (125 trials total). To  
285 determine whether release orientation impacted the distribution of orientations on impact and  
286 final landing, we considered three orientation outcomes for impact: upright, upside-down and  
287 other (comprising side, caudal and head down) and two for landing: upright and upside-down.  
288 (Fig. 3) We found that neither the orientation distribution on impact nor on final landing showed  
289 significant differences based on release orientation (orientation at impact: Fisher's exact test,  $p =$   
290  $0.22$ ; orientation at final landing,  $\chi^2$  test,  $p = 0.80$ ). This suggests that orientation upon impact  
291 and landing are independent of release orientation. Similarly, for dead nymphs (30 specimens, 1  
292 trial each per release orientation) dropped onto a hard substrate, the distributions of final landing  
293 orientations did not depend significantly on release orientation for spread legs ( $\chi^2$  test,  $p = 0.86$ ).  
294 (Dataset S1) We consequently analyzed these datasets summed over release orientations, and  
295 only recorded data for a single release orientation (side down) when studying dead specimens  
296 with legs spread and tucked.

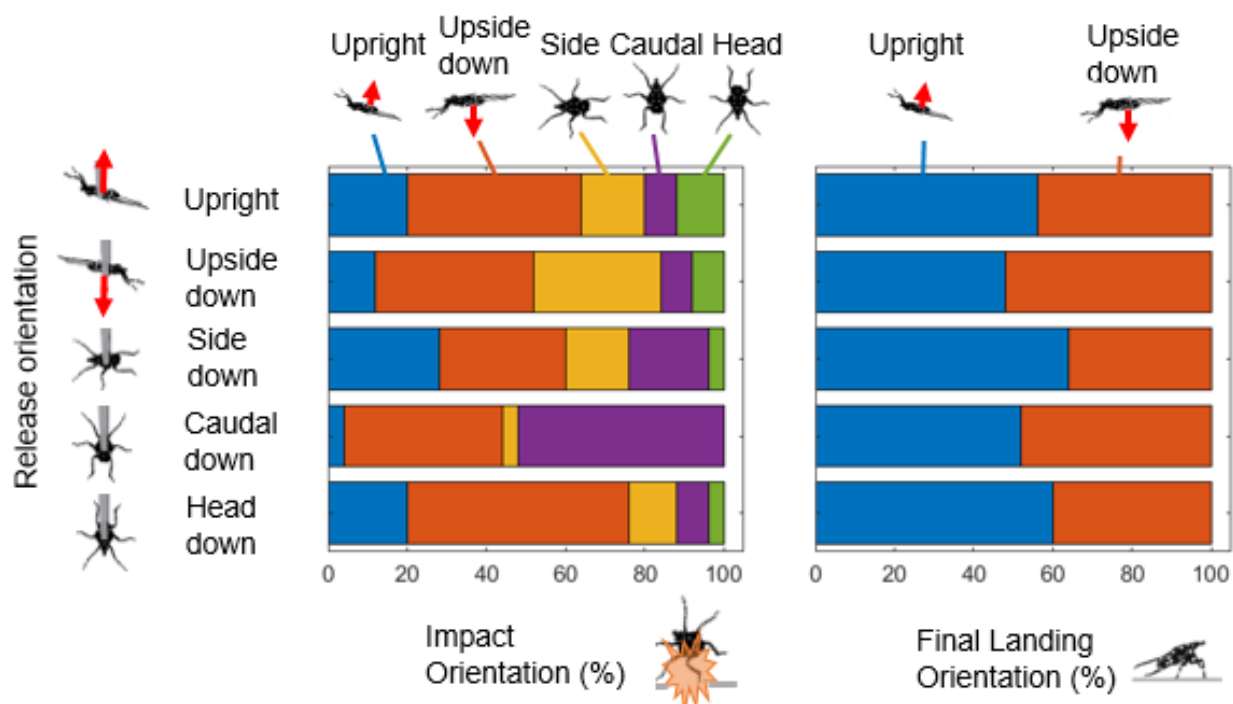

298 Figure 3. Distribution of orientation at impact and final landing for live spotted lanternfly fourth  
299 instar nymphs dropped on a hard surface from each of five release orientations. (Red arrow  
300 points towards the dorsal surface when viewed in lateral aspect.)  
301

301

### 302 3.2 Aerial phase

303 Fig. 4A shows a typical sequence of motions by live SLF nymphs during the aerial phase of the  
304 dropping experiments. (Movie 1) In the majority of trials (97.1% = 135/139) artificially released  
305 specimens assumed a stereotypical falling posture within 0.079 s [0.029, 0.129] s after release, in  
306 which they spread their legs fully and held them slightly above the dorsal plane until impact.  
307 (Fig. 4B) Results from kinematic data analysis are shown as summary statistics in Table 1. All  
308 measured trajectories of artificially released live and dead SLF nymphs were predominantly  
309 vertical (mean horizontal excursions  $\leq 4.3$  mm). We were successful at filming a total of 15  
310 voluntary release trials for five specimens from 354 mm [342, 365] mm above the hard substrate  
311 (Fig. 5B). These trajectories displayed greater horizontal excursions (24 mm [13, 35] mm) than  
312 observed for the artificial releases. All falling trajectories for all conditions agreed well with a  
313 quadratic drag model ( $R^2 \geq 0.9998$ ; fit-residuals 0.9 mm [0.7, 1.0] mm). (Fig. 4C) Terminal  
314 speed did not differ significantly between live specimens released voluntarily and artificially  
315 (Tukey's HSD,  $p = 0.48$ ) (Fig. 4D). Dead specimens with their legs tucked had a mean terminal  
316 velocity that was greater and statistically different from all other conditions (i.e., live and dead  
317 with legs spread) (Tukey's HSD,  $p < 0.0001$ ), whereas analysis of live and dead with legs spread  
318 found no significant differences (Tukey's HSD,  $p > 0.74$ ). (Fig. 4D). During falling, all SLF  
319 nymphs studied here had speeds corresponding to Reynolds number  $Re$  in the range,  $[10^2, 10^4]$ ,  
320 consistent with values reported for gliding arthropods (Ellington, 1991).

321

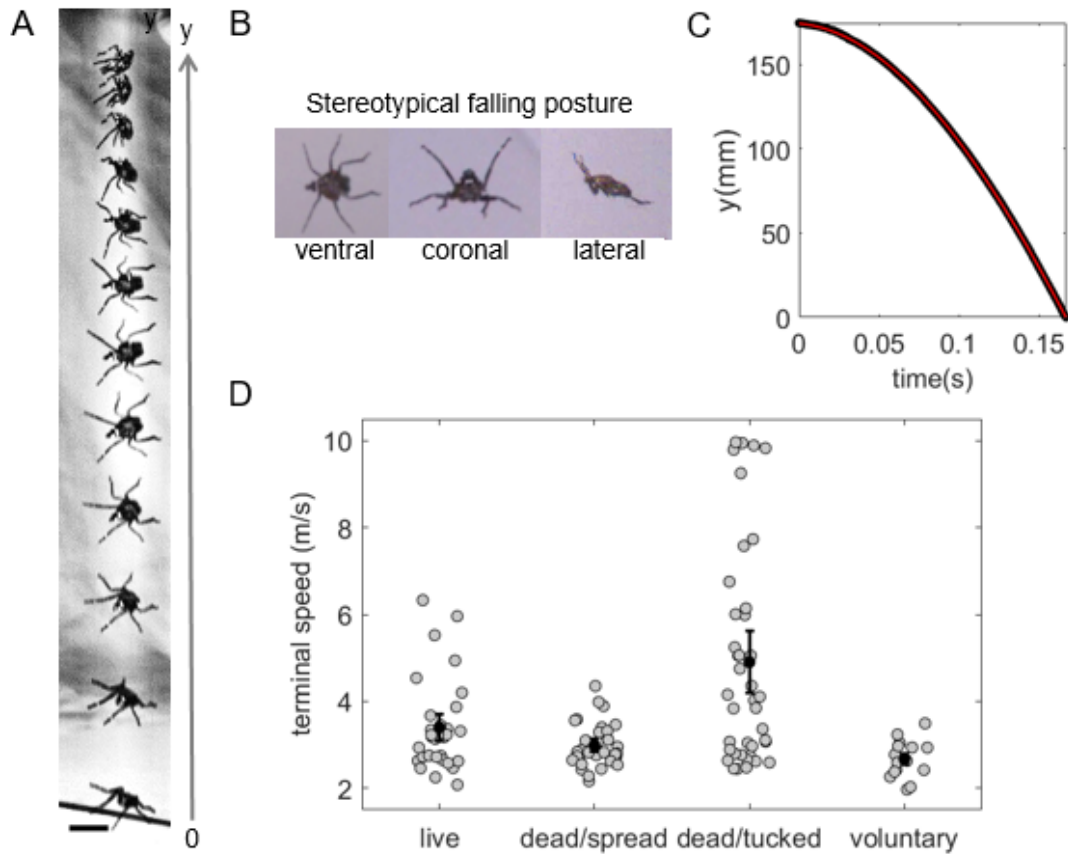

322  
323 Figure 4. A) Stereotypical falling posture assumed by spotted lanternfly nymphs after dropping.  
324 B) Superimposed sequence of video frames recorded every 15 ms showing a spotted lanternfly  
325 nymph falling 200 mm. (Scale bar: 10 mm). C) Measured (open circles) and fitted (red line)  
326 vertical position,  $y$ , of the specimen shown in B) plotted vs time. D) Fitted terminal falling speed  
327 distributions for live and dead specimens artificially dropped from 20 cm and live specimens  
328 voluntarily releasing from 35 cm. (black circles: mean; error bars: 95% CI; gray circles: all  
329 data, jittered for visibility.)

330  
331 We next consider results for the aerial rotational kinematics, which differed significantly  
332 between live and dead specimens. The rotation rate after release,  $\Omega_{rel}$ , of live specimens was  
333 significantly larger than for dead specimens (one-sided t-test  $p = 2.4 \times 10^{-5}$  vs dead with legs  
334 spread and  $p = 0.0013$  vs dead with legs tucked). (Fig 5A) The value of  $\Omega_{rel}$  was independent of  
335 the release method for live specimens, and of pose for the dead specimens (two-sided t-test,  $p =$   
336  $0.365$  live by release method,  $p = 0.157$  dead by pose). To illustrate how rotation rate changed

337 during falling, we computed the change in rotation rate magnitude,  $\Delta|\Omega|$ , at the midpoint and  
338 impact relative to its value at release (Fig. 5B). These data showed that rotation rates tend to  
339 decrease with fall time among live specimens, but increase or stay the same for the dead  
340 specimens. In some cases, live nymphs changed the direction of their rotation or increased their  
341 spin to a greater rotation rate mid-fall than at either release or impact. A variety of related  
342 behaviors could be observed on some videos of live nymphs: 1) pushing off the wall (voluntary)  
343 and tweezers (artificial) so as to impart an initial spin; 2) changing the orientation and extension  
344 of their legs during falls so as to alter their rotational inertia (Movie 1).  
345

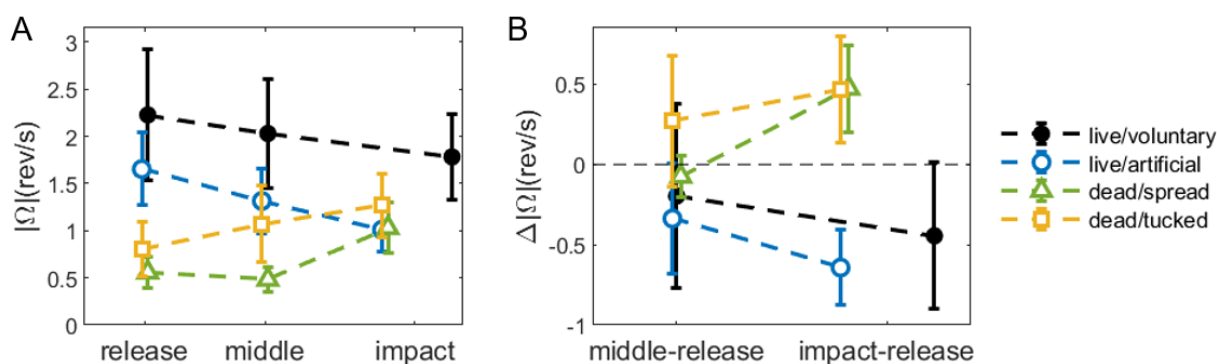

346  
347 Figure 5. Rate of spotted lanternfly nymph body rotation in the image plane upon release, at an  
348 approximate midpoint during the fall, and immediately before impact. (A) Rotation rate  
349 magnitudes show different trends during the fall period for live nymphs (circles) relative to dead  
350 specimens with legs spread (triangles) or tucked (squares). (B) Plots of the change in rotation  
351 rate magnitude between the midpoint and at impact relative to release (equivalent to scaling the  
352 initial rotation rate at release to zero) for different release methods and specimen preparations.).  
353 (Error bars show 95% CI, which were similar to instrumental measurement uncertainties.  
354 Horizontal distances between data points are proportional to time; data also are jittered for  
355 visibility.)

356

### 357 3.3 Impact orientation

358 Fig. 6 shows the orientation distributions for specimens at impact and final landing on the hard  
359 substrate for live and dead SLF nymphs for artificial and voluntary releases. The impact  
360 orientation was found to differ between live nymphs and dead with legs tucked (Fisher exact test,

361  $p = 0.00005$ ) but not between live and dead with legs spread (Fisher exact test,  $p = 0.95$ ). For  
362 voluntary releases, a greater fraction impacted upright (67%) than when artificially released, and  
363 no specimens that released voluntarily impacted upside down (Fig 6B). The distributions of  
364 orientations on impact differed significantly for live specimens between the two release  
365 conditions (Fisher's exact test,  $p < 8 \times 10^{-6}$  and  $p = 0.00039$ , impact and 200 mm respectively).  
366 (Fig. 6) To make sure that release height did not influence this last finding, we also measured the  
367 distribution of orientations after specimens that released voluntarily had fallen 200 mm, the  
368 height used for artificial releases. This distribution also was similar to that found at impact  
369 (Fisher's exact test,  $p = 0.71$ ). (Fig. 6B)

370

371 We also compared these data with a probabilistic model that assumed the likelihood of a  
372 specimen impacting the surface in a given orientation is proportional to the fraction of solid  
373 angles corresponding to how we scored that orientation. Because we used a fixed angle,  $\theta = 45$   
374 deg, between the horizontal and the body's cranial-caudal axis to define orientation at impact,  
375 this gives a probability of impacting either upright or upside down equal to the solid angle  
376 subtended by a spherical cap with polar angle  $\theta$ . This corresponds to a prediction that the fraction  
377 impacting the surface upright should be  $29.3\% = 2\pi(1 - \cos \theta)/4\pi = (1 - \cos 45 \text{ deg})/2$ , the same  
378 fraction (29.3%) should impact upside down, and the remaining 41.4% impact at all other  
379 possibilities combined. The predictions of this model were not consistent with data for nymphs  
380 falling on the hard substrate for live or dead/tucked ( $\chi^2$  test,  $p < 0.0010$  and  $p < 9 \times 10^{-14}$ ,  
381 respectively). For dead/spread, disagreement with the model could not be ruled out ( $p = 0.37$ ).

382

383 While we were unable to release specimens above leaves reproducibly enough to study their  
384 impact and landing distributions *per se*, we did film 49 trials in which 15 different nymphs  
385 landed successfully on *A. altissima* leaves (1-6 landings/specimen). (Fig. 7A) Those specimens  
386 that landed successfully impacted leaflets upright in 49% of cases and upside down 33% of the  
387 time. The remaining 18% impacted on a combination of their caudal (6%), side (6%) or head  
388 (2%), or clung on impact to the edge of a leaflet (4%). (Fig. 7B)

389

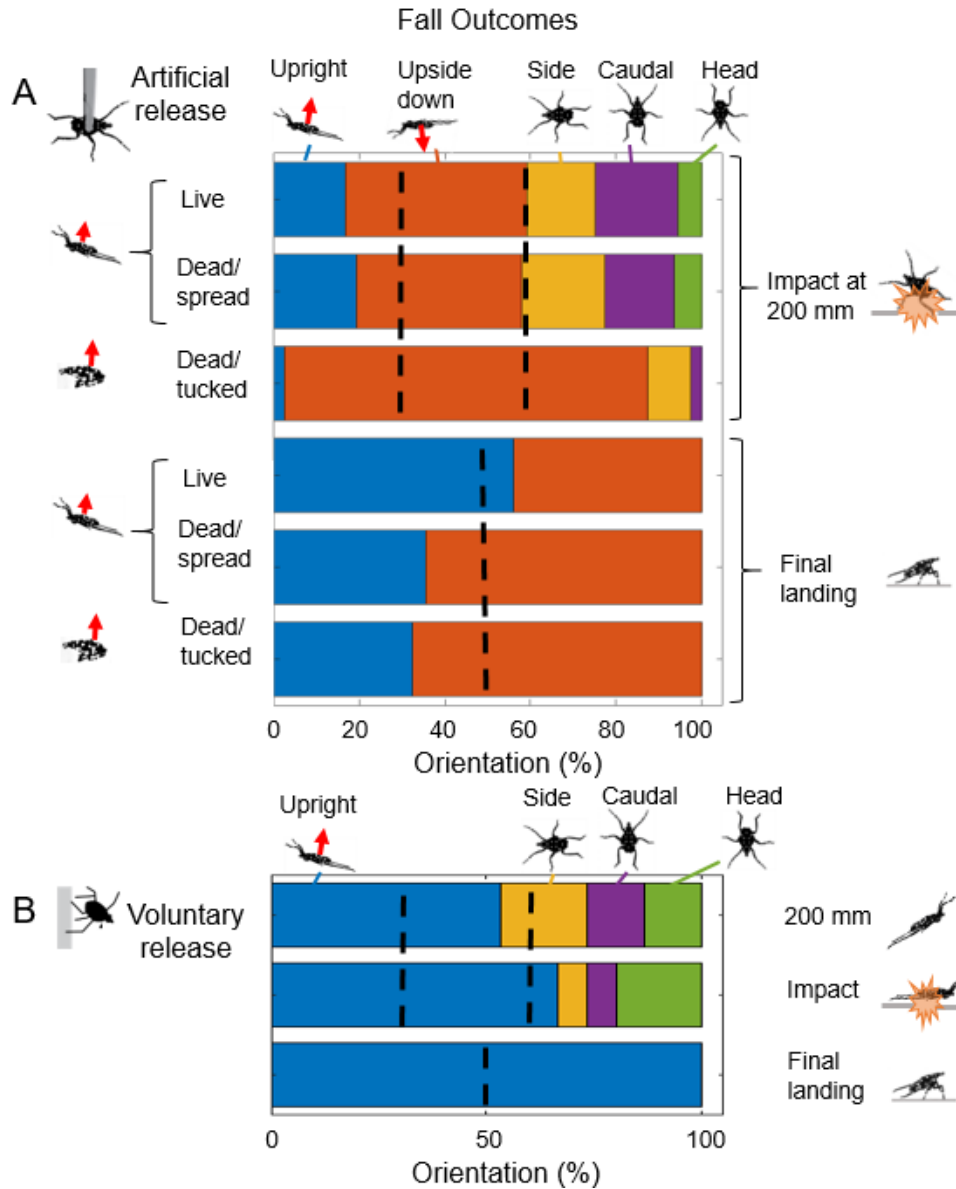

390  
 391 Figure 6. Distribution of impact and final landing orientations for spotted lanternfly nymphs (A)  
 392 dropped artificially from tweezers and (B) releasing voluntarily onto a hard paper surface. The  
 393 distributions from B) recorded at 200 mm below the release point corresponded to the same  
 394 falling distance as those recorded for impact in A). From left to right, top to bottom in each plot:  
 395 the dotted lines represent model predictions for upright landings (29.3%) and upside down  
 396 landings (29.3%) at impact, and the expectation for upright vs upside down final landing  
 397 orientation (50%), if landing orientation were random. (red arrows = dorsoventral axis)  
 398



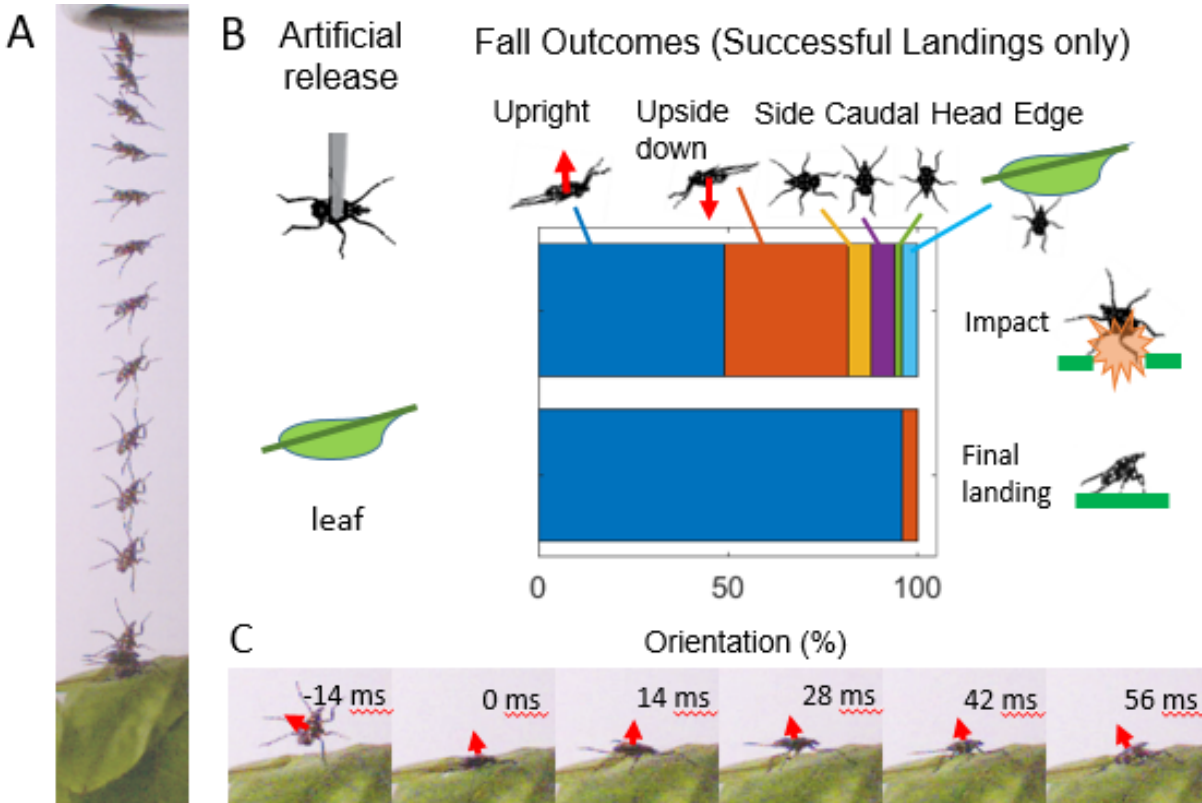

399

400 Figure 7. A) Typical image sequence for spotted lanternfly nymphs falling onto *A. altissima*  
401 leaflets. B) Orientation distributions at first impact and landing for specimens that successfully  
402 landed on leaflets. Because we only characterized successful landings on leaves, these results  
403 cannot be compared to the data and models shown in Fig. 6. C) Image sequence showing  
404 bouncing from a leaflet. (impact = 0 ms; red arrows = dorsoventral axis)

405

### 406 3.4 Bouncing post-impact

407 Table 2 gives summary statistics for the results of analyzing the post-impact bouncing behaviors.  
408 After impact, the vast majority of SLF nymphs bounced at least once, with rebound heights at  
409 most a few mm. (Fig. 7C, Fig. 8A) (Movie 1) As expected from their greater release height,  
410 specimens released voluntarily impacted the surface at a significantly higher speed than those  
411 released artificially (Tukey's HSD,  $p = 0.001$ ); impacts speeds did not differ significantly  
412 between any of the other conditions (Fig. 8B). For bounce height, dead/tucked was significantly  
413 different from all live conditions (Tukey's HSD,  $p < 0.001$ ). The only other significant  
414 difference was between voluntarily released live specimens and dead/spread (Tukey's HSD,  $p =$   
415 0.014). (Fig. 8B, C)

416

417 For the 20 trials for which the bounce trajectory could be measured for landing on leaflets, the  
418 impact speed and maximum bounce height were consistent with that for live nymphs impacting  
419 the hard substrate. (Fig. 8B, C) One notable difference was that the compliant leaflets always  
420 recoiled and vibrated after impact. (Movie 1) For both substrates and all specimen preparations,  
421 these bounce heights corresponded to a near-total loss of initial kinetic energy upon colliding  
422 with the substrate. Bounce height was weakly correlated with kinetic energy ( $\propto v_{imp}^2$ ) among live  
423 specimens, and only dead/tucked specimens had bounce heights that varied linearly with kinetic  
424 energy (Fig. 8D). We suspect that the difference in bounce height between live and dead  
425 specimens (Fig. 8C) was due in part to the tendency of live, but not dead, nymphs to adhere to  
426 the substrate on or immediately after impact with one or more feet. We also observed some high  
427 bounces among dead/spread specimens when their legs remained extended on impact, appearing  
428 to act as springs rather than collapsing as observed for live specimens.

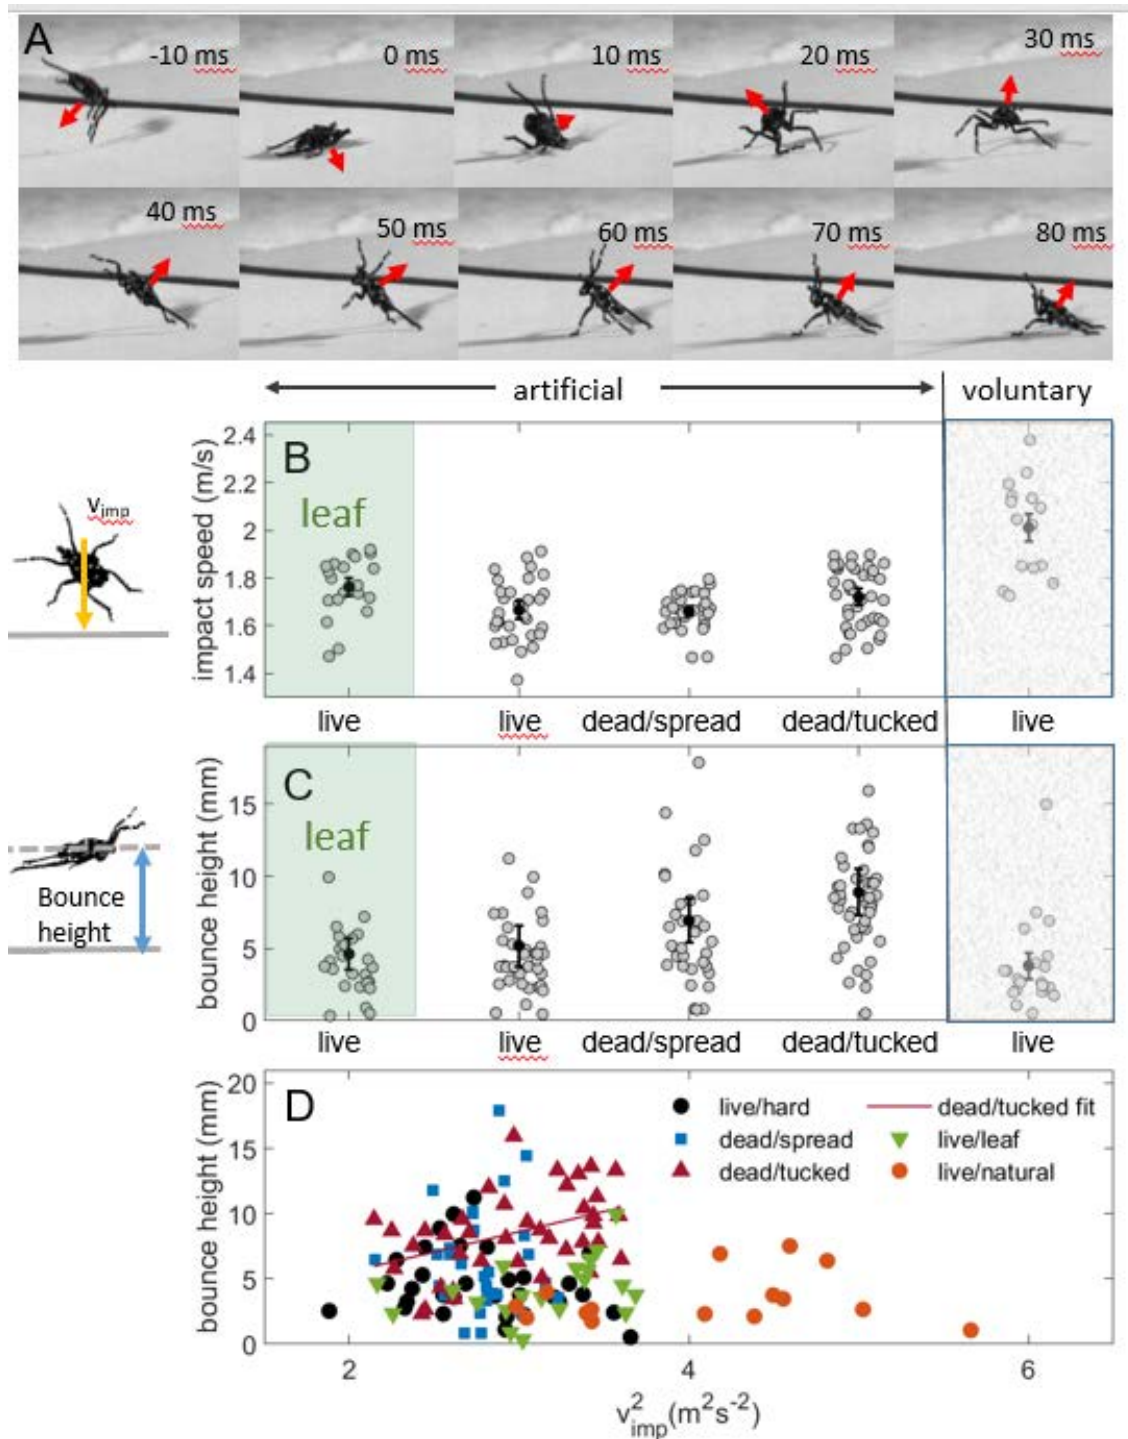

429

430 Figure 8. A) Image sequence from a video of fourth instar spotted lanternfly nymph landing on

431 its back on the hard substrate, bouncing, and finally landing upright. (impact = 0 ms; red arrows

432 = dorsoventral axis) Distributions for B) bounce height and C) impact speed,  $v_{imp}$ , for live and

433 dead specimens artificially dropped from 20 cm onto the hard substrate and leaves and live

434 specimens voluntarily releasing from 35 cm. (black circles: mean; error bars: 95% CI; g circles:  
435 all data, jittered for visibility.) D) Bounce height vs  $v_{imp}^2$  ( $\propto$  kinetic energy before impact).

436

### 437 3.5 Final landing behavior

438 First we consider results for the orientation at final landing (e.g., when the specimen came to rest  
439 on the substrate.) A comparison of final landing distributions found that artificially released SLF  
440 nymphs were significantly more likely to land upright on the hard substrate when live (56%)  
441 than dead with legs spread (35%) or tucked (33%) (Fisher exact test,  $p = 0.046$  and  $0.011$   
442 respectively). (Fig. 6A) While the number of upright final landing distribution for live  
443 specimens released artificially ( $\chi^2$  test,  $p = 0.180$ ) were consistent with random chance, this was  
444 not true for those releasing voluntarily, 100% of which finally landed upright ( $p = 0.00011$ ). In  
445 addition, compared to artificially released specimens, significantly more SLF nymphs releasing  
446 voluntarily were oriented upright on final landing ( $p = 0.00043$ ). (Fig 6B) The fraction of dead  
447 specimens that landed upright was lower than predicted by random chance for legs tucked ( $\chi^2$   
448 test,  $p = 0.0027$ ); for legs spread, the smaller number of observations led to an insignificant test  
449 ( $p = 0.106$ ).

450

451

452 Next, we consider how the orientation at final landing relates to that at first impact. For live  
453 nymphs released artificially, the distributions of orientations at impact were significantly  
454 different from those upon final landing on the hard substrate (Fisher's exact test,  $p < 1.3 \times 10^{-10}$ ),  
455 with a higher percentage achieving an upright orientation at final landing (56%) than on impact  
456 (17%). The impact and final landing orientation distributions for voluntary releases also differed  
457 significantly (Fisher's exact test,  $p = 0.042$ ). The reason why the impact and final landing  
458 distributions differed was due in part to the fact that most specimens bounced at least once upon  
459 impact and frequently changed orientations as a consequence. Those nymphs that did not land  
460 fully upright immediately after bouncing often were able to pull themselves upright as part of a  
461 continuous sequence of motion. (Movie 1) The minority of nymphs that did not bounce on  
462 impact either adhered immediately to the substrate upon impact, rolled, or slid to a stop. We  
463 observed during preliminary trials that many nymphs that did not come to rest upright upon

464 landing eventually were able to self-right terrestrially without assistance, although we did not  
465 study this behavior further.

466  
467 For landing on leaves, the distribution of orientations also differed significantly between impact  
468 and final landing for successful landings (Fisher's exact test,  $p < 1 \times 10^{-7}$ ). The vast majority  
469 (96%) of successful final landings were upright, with the remainder oriented upside down.  
470 Because we only characterized successful landings on leaves, we did not compare these results to  
471 data for all fall outcomes for the other conditions, or to the model, which requires an analysis of  
472 all outcomes. SLF nymphs relied on behaviors similar to those found for the hard substrate to  
473 cling to leaves after impact. Due to a combination of bouncing, sliding or leaflet vibration, in  
474 33% of the successful landings, the nymphs landed on a surface different from the one on which  
475 they made initial impact (i.e., a different leaflet or nearby stem.) In several cases, we observed  
476 nymphs grasping a leaflet by its edge by one or more feet and pulling itself successfully onto the  
477 surface after a struggle. (Movie 1)

478

## 479 4. Discussion

480 In summary, our study supports the following conclusions: first, spotted lanternfly nymphs  
481 falling through ecologically relevant distances used a combination of all righting mechanisms  
482 available to them (Davis *et al.*, 2011), including aerial re-orientation, re-orientation during  
483 bouncing, and terrestrial righting, the last of which we do not discuss here. This diverse, flexible  
484 arsenal of landing tactics provides SLF nymphs with a variety of ways to respond to surfaces  
485 with unpredictable positions, orientations, compliances, textures and other mechanical  
486 properties.

487 Second, our measurements also provide support for SLF nymphs employing both passive and  
488 active righting. In virtually all trials, SLF nymphs assumed a stereotypical falling posture similar  
489 to those reported previously for falling pea aphids (Ribak *et al.*, 2013), stick insect instars (Jusufi  
490 *et al.*, 2011), and geckos (Jusufi *et al.*, 2008), as well as gliding ants (Yanoviak, Munk and  
491 Dudley, 2011) and spiders (Yanoviak, Munk and Dudley, 2015). They assume this posture  
492 within 0.079 s [0.029, 0.129] s after release. Supporting the hypothesis that this posture  
493 increases drag, we found that the terminal speed for live and dead specimens with legs spread

494 was significantly lower than for dead ones with legs tucked compactly against the body. Dead  
495 specimens with legs tucked also were significantly less likely to impact upright than either live  
496 or dead specimens in the falling posture. This supports the argument that the stereotypical falling  
497 posture contributes to aerial righting (Yanoviak, Munk and Dudley, 2011; Ribak *et al.*, 2013).  
498 When live specimens were able to release voluntarily from surfaces, they were predominantly  
499 oriented upright after falling 200 mm to a greater extent than live specimens released artificially.  
500 This result suggests that when allowed to release voluntarily, SLFs may be modulating initial  
501 release conditions to achieve greater upright landing success. The rotational kinematic data  
502 during falling indicated that compared to dead specimens, live nymphs rotated more quickly  
503 upon release and decreased their rotation rates during falls, likely due to their observed ability to  
504 push off the surface of last contact and actively move their legs midair, whereas dead specimens  
505 tended to increase their mean rotation rates during falling. Because a nonzero change in rotation  
506 rate during the aerial phase requires either a net aerodynamic torque or a change in rotational  
507 inertia, these findings suggest likely roles for a combination of aerodynamic torque and active  
508 control in determining fall outcomes. Taken together, our kinematic results point to a role for  
509 active control to achieve righting during the aerial phase.

510 Third, live and dead specimens also were found to reorient frequently post-impact. Importantly,  
511 in spite of impacting the surface with similar speeds and orientations, live SLF nymphs finally  
512 landed upright significantly more often than dead specimens, even those with legs spread. This  
513 supports an important additional role for post-impact active righting. To land securely, SLF  
514 nymphs need to quickly dissipate kinetic energy via a combination of air drag, work of adhesion,  
515 surface friction, and deformation of the body and substrate. High-speed video revealed that the  
516 majority of SLF nymphs accomplished this in large measure by bouncing after impact when  
517 landing, resulting in energy losses similar to the values reported for head-on collisions by crash-  
518 landing locusts (76%) (Reichel, Labisch and Dirks, 2019) and by running cockroaches hitting  
519 walls (95%) (Jayaram *et al.*, 2018). Just as adhesive foot pads were noted to influence landing  
520 mechanics for falling pea aphids and locusts (Ribak *et al.*, 2013; Reichel, Labisch and Dirks,  
521 2019), SLF nymphs in this study also made use of adhesion to paper and leaves to reorient and  
522 come to rest after bouncing.

523

524 We also found that similar strategies and outcomes were achieved when falling on compliant  
525 leaves as on a hard substrate. The oscillatory recoil of the leaflet post-impact did not function to  
526 eject the SLF, which experienced energy losses similar to those recorded for hard substrates.  
527 Studying landings on leaves of the preferred host plant revealed several unique landing behaviors  
528 not observable on hard flat surfaces, including clinging to the very edge of leaflets, grasping  
529 stems and bouncing onto and landing on lower-lying leaflets after initial impact. This indicates  
530 that insects falling into underlying foliage could slow down gradually via successive collisions,  
531 each of which affords the SLF an opportunity for landing securely. This interpretation is  
532 consistent with an earlier study in which pea aphids were induced to drop when on different host  
533 plants. The authors found that the probability of dropping pea aphids landing within a host plant  
534 instead of on the ground increases approximately linearly with increasing release height  
535 (Meresman, Ben-Ari and Inbar, 2017)--as would be expected if landing success depends on  
536 multiple attempts--as opposed to reaching a plateau--as would be expected if the limiting factor  
537 was the time required to self-right aurally. The SLF nymphs' effectiveness at clinging with a  
538 single foot or claw on leaves and their ability to use their arolia for adhesion enhance their ability  
539 to settle into a final upright orientation successfully following impact at a variety of angles. This  
540 is important because leaflets and other potential perches are encountered at a wide variety of  
541 angles in natural habitats. Thus, the ability of SLF nymphs to cling securely to the complex  
542 foliage of their preferred host suggest that landing upright in itself might not be a necessary or  
543 preferred strategy. This possibility deserves to be considered in studying of aerial righting and  
544 related phenomena.

545  
546 Finally, we found that the outcomes of landings after SLF nymphs launched voluntarily from  
547 walls were very different from when they were released artificially with minimal speed and  
548 rotation rate. Similarly, falling pea aphids were reported to self-right only when released with  
549 nonzero initial spin (Ribak *et al.*, 2013). This finding suggests that there is some aspect to  
550 preparation or voluntary release that can potentially alter the initial conditions of the fall, setting  
551 them up for more upright outcomes. It remains to be explored how the more detailed aerial  
552 motions of this species relate to postural control with the goal of ensuring an upright landing.  
553 For example, ants (Yanoviak, Munk and Dudley, 2011), spiders (Yanoviak, Munk and Dudley,

554 2015) and stick insect instars (Zeng *et al.*, 2017) have been shown to use coordinated motions of  
555 their legs and appendages during falling to initiate, reorient and stabilize their body orientation.

556  
557 Taken together, these results point to the importance of studying both aerial and post-impact  
558 righting behavior. While most studies on righting behavior during falling have focused on aerial  
559 righting, for spotted lanternfly nymphs, post-impact reorientation plays a central role in  
560 achieving a final, upright posture in an exceedingly short period of time. Reorientations after  
561 impact due to bouncing in particular are so rapid that they cannot be detected without high-speed  
562 imaging. The significantly different outcomes observed when specimens were allowed to launch  
563 voluntarily from surfaces, combined with some of the unique behaviors observed during falling  
564 on leaves, points towards the need to conduct tests in naturalistic environments whenever  
565 possible, to better understand ecologically significant behaviors.

566

## 567 Acknowledgements

568 We wish to express our appreciation to Eric Beery for work on preliminary planning and pilot  
569 experimental studies, Charles Bone and Jennie Ciborowski for help locating specimens and  
570 identifying plants in the Haverford College Arboretum, Hongyou Lin for journal article  
571 translations, and Naia Hsieh, Sydney Hsieh and Karen Masters for assistance in collecting  
572 specimens.

573

## 574 Competing Interests

575 The authors have no conflicting interests to declare.

576

## 577 Funding

578 Haverford College, National Science Foundation CAREER award to STH (IOS-1453106).

579

## 580 Data Availability

581 All data and software required to reproduce the figures and results are included in the  
582 Supplemental Materials.



583

584

## 585 References

586 Avanesyan, A., Maugel, T. K. and Lamp, W. O. (2019) 'External morphology and  
587 developmental changes of tarsal tips and mouthparts of the invasive spotted lanternfly, *Lycorma*  
588 *delicatula* (Hemiptera: Fulgoridae)', *PLoS ONE*, 14(12). doi: 10.1371/journal.pone.0226995.

589 Cooperband, M. *et al.* (2019) *Dispersal and host preference of marked and released spotted*  
590 *lanternfly, Otis laboratory 2018 annual report*. United States Department of Agriculture  
591 Buzzards Bay, MA.

592 Dara, S. K., Barringer, L. and Arthurs, S. P. (2015) 'Lycorma delicatula (Hemiptera:  
593 Fulgoridae): A New Invasive Pest in the United States', *Journal of Integrated Pest Management*,  
594 6(1). doi: 10.1093/jipm/pmv021.

595 Davis, M. *et al.* (2011) 'A review of self-righting techniques for terrestrial animals', in  
596 *International Workshop for Bio-inspired Robots*.

597 Ellington, C. P. (1991) 'Aerodynamics and the Origin of Insect Flight', in Evans, P. D. (ed.)  
598 *Advances in Insect Physiology*. Academic Press, pp. 171–210. doi: 10.1016/S0065-  
599 2806(08)60094-6.

600 Faisal, A. A. and Matheson, T. (2001) 'Coordinated righting behaviour in locusts', *Journal of*  
601 *Experimental Biology*, 204(4), pp. 637–648.

602 Francese, J. A. *et al.* (2020) 'Developing Traps for the Spotted Lanternfly, *Lycorma delicatula*  
603 (Hemiptera: Fulgoridae)', *Environmental Entomology*, 49(2), pp. 269–276. doi:  
604 10.1093/ee/nvz166.

605 Frantsevich, Leonid *et al.* (2008) 'Adhesive properties of the arolium of a lantern-fly, *Lycorma*  
606 *delicatula* (Auchenorrhyncha, Fulgoridae)', *Journal of Insect Physiology*, 54(5), pp. 818–827.  
607 doi: 10.1016/j.jinsphys.2008.03.005.

608 Haldane, J. B. S. (1985) *On Being the Right Size and other essays*. Oxford University Press.  
609 Available at: [https://www.cambridge.org/core/journals/genetics-research/article/on-being-the-  
610 right-size-and-other-essays-by-haldanej-b-s-edited-by-maynard-smithjohn-oxford-university-  
611 press-1985-191-pages-495-isbn-0-19-286045-3/84E533EB77F908CD8FD5313CC8B2B7B6](https://www.cambridge.org/core/journals/genetics-research/article/on-being-the-right-size-and-other-essays-by-haldanej-b-s-edited-by-maynard-smithjohn-oxford-university-press-1985-191-pages-495-isbn-0-19-286045-3/84E533EB77F908CD8FD5313CC8B2B7B6)  
612 (Accessed: 28 January 2021).

613 Humphreys, R. K. and Ruxton, G. D. (2019) 'Dropping to escape: a review of an under-  
614 appreciated antipredator defence', *Biological Reviews*, 94(2), pp. 575–589. doi:  
615 10.1111/brv.12466.

- 616 Jayaram, K. *et al.* (2018) ‘Transition by head-on collision: mechanically mediated manoeuvres in  
617 cockroaches and small robots’, *Journal of The Royal Society Interface*, 15(139), p. 20170664.  
618 doi: 10.1098/rsif.2017.0664.
- 619 Jung, M. *et al.* (2016) ‘Effect of Harmonic Radar Tagging on *Lycorma delicatula* (Hemiptera:  
620 Fulgoridae) Nymphal Mobility and Survivorship’, *Florida Entomologist*, 99(1), pp. 47–51. doi:  
621 10.1653/024.099.0109.
- 622 Jusufi, A. *et al.* (2008) ‘Active tails enhance arboreal acrobatics in geckos’, *Proceedings of the*  
623 *National Academy of Sciences*, 105(11), pp. 4215–4219. doi: 10.1073/pnas.0711944105.
- 624 Jusufi, A. *et al.* (2011) ‘Aerial Righting Reflexes in Flightless Animals’, *Integrative and*  
625 *Comparative Biology*, 51(6), pp. 937–943. doi: 10.1093/icb/icr114.
- 626 Kim, J. G. *et al.* (2011) ‘Cyclic Behavior of *Lycorma delicatula* (Insecta: Hemiptera: Fulgoridae)  
627 on Host Plants’, *Journal of Insect Behavior*, 24(6), p. 423. doi: 10.1007/s10905-011-9266-8.
- 628 Kleppner, D. and Kolenkow, R. (2014) *An introduction to mechanics*. Cambridge University  
629 Press.
- 630 Lee, D.-H., Park, Y.-L. and Leskey, T. C. (2019) ‘A review of biology and management of  
631 *Lycorma delicatula* (Hemiptera: Fulgoridae), an emerging global invasive species’, *Journal of*  
632 *Asia-Pacific Entomology*, 22(2), pp. 589–596. doi: 10.1016/j.aspen.2019.03.004.
- 633 Li, C. *et al.* (2019) ‘Cockroaches use diverse strategies to self-right on the ground’, *Journal of*  
634 *Experimental Biology*, 222(15). doi: 10.1242/jeb.186080.
- 635 Meresman, Y. *et al.* (2014) ‘The stimuli evoking the aerial-righting posture of falling pea  
636 aphids’, *Journal of Experimental Biology*, 217(19), pp. 3504–3511. doi: 10.1242/jeb.107490.
- 637 Meresman, Y., Ben-Ari, M. and Inbar, M. (2017) ‘Turning in mid-air allows aphids that flee the  
638 plant to avoid reaching the risky ground’, *Integrative Zoology*, 12(5), pp. 409–420. doi:  
639 10.1111/1749-4877.12263.
- 640 Nixon, L. J., Ludwick, D. C. and Leskey, T. C. (2021) ‘Horizontal and vertical dispersal capacity  
641 and effects of fluorescent marking on *Lycorma delicatula* nymphs and adults’, *Entomologia*  
642 *Experimentalis et Applicata*, 169(2), pp. 219–226. doi: <https://doi.org/10.1111/eea.13002>.
- 643 R Core Team (2017) *R: A language and environment for statistical computing*. Vienna, Austria:  
644 R Foundation for Statistical Computing. Available at: <https://www.R-project.org/>.
- 645 Reichel, S. V., Labisch, S. and Dirks, J.-H. (2019) ‘What goes up must come down:  
646 biomechanical impact analysis of falling locusts’, *Journal of Experimental Biology*, 222(14). doi:  
647 10.1242/jeb.202986.
- 648 Ribak, G. *et al.* (2013) ‘Adaptive aerial righting during the escape dropping of wingless pea  
649 aphids’, *Current Biology*, 23(3), pp. R102–R103. doi: 10.1016/j.cub.2012.12.010.

- 650 Schneider, C. A., Rasband, W. S. and Eliceiri, K. W. (2012) ‘NIH Image to ImageJ: 25 years of  
651 image analysis’, *Nature Methods*, 9(7), pp. 671–675. doi: 10.1038/nmeth.2089.
- 652 Socha, J. J. *et al.* (2015) ‘How animals glide: from trajectory to morphology’, *Canadian Journal*  
653 *of Zoology*, 93(12), pp. 901–924. doi: 10.1139/cjz-2014-0013.
- 654 Urban, J. M. (2020) ‘Perspective: shedding light on spotted lanternfly impacts in the USA’, *Pest*  
655 *Management Science*, 76(1), pp. 10–17. doi: 10.1002/ps.5619.
- 656 Yanoviak, S. P., Munk, Y. and Dudley, R. (2011) ‘Evolution and Ecology of Directed Aerial  
657 Descent in Arboreal Ants’, *Integrative and Comparative Biology*, 51(6), pp. 944–956. doi:  
658 10.1093/icb/icr006.
- 659 Yanoviak, S. P., Munk, Y. and Dudley, R. (2015) ‘Arachnid aloft: directed aerial descent in  
660 neotropical canopy spiders’, *Journal of The Royal Society Interface*, 12(110), p. 20150534. doi:  
661 10.1098/rsif.2015.0534.
- 662 Zeng, Y. *et al.* (2015) ‘Visual ecology of directed aerial descent in first-instar nymphs of the  
663 stick insect *Extatosoma tiaratum*’, *Journal of Experimental Biology*, 218(14), pp. 2305–2314.  
664 doi: 10.1242/jeb.109553.
- 665 Zeng, Y. *et al.* (2017) ‘Biomechanics of aerial righting in wingless nymphal stick insects’,  
666 *Interface Focus*, 7(1), p. 20160075. doi: 10.1098/rsfs.2016.0075.
- 667 Zhang, J. *et al.* (2021) ‘Self-righting physiology of the ladybird beetle *Coccinella*  
668 *septempunctata* on surfaces with variable roughness’, *Journal of Insect Physiology*, 130, p.  
669 104202. doi: 10.1016/j.jinsphys.2021.104202.

670

671 **Tables**

672

| <b>Specimen / substrate</b>   | <b># specimens/trials</b>               | <b>Terminal speed, <math>v_{ter}</math> (m/s)</b> | <b>Re at <math>v_{ter}</math></b> | <b><math> \Omega_{rel} </math>(rev/s)</b> | <b><math> \Omega_{mid} </math>(rev/s)</b> | <b><math> \Omega_{imp} </math>(rev/s)</b> |
|-------------------------------|-----------------------------------------|---------------------------------------------------|-----------------------------------|-------------------------------------------|-------------------------------------------|-------------------------------------------|
| Live, voluntary release/paper | 15 (5 specimens; 2-5 trials/specimen)   | 2.7 [2.5, 2.9]                                    | 2071 [1896, 2246]                 | 2.17 [1.59, 2.75]                         | 2.03 [1.49, 2.57]                         | 1.78 [1.36, 2.21]                         |
| Live/paper                    | 31 (5 specimens, 6-7 trials/specimen)   | 3.4 [3.0, 3.8]                                    | 2431 [2144, 2718]                 | 1.62 [1.27, 1.96]                         | 1.32 [0.99, 1.64]                         | 1.01 [0.79, 1.23]                         |
| Dead/spread, paper            | 31 (5 specimens, 5-10 trials /specimen) | 3.0 [2.8, 3.2]                                    | 2157 [2018, 2295]                 | 0.55 [0.40, 0.70]                         | 0.48 [0.36, 0.61]                         | 1.03 [0.78, 1.28]                         |
| Dead/tucked, paper            | 40 (5 specimens, 5-10 trials /specimen) | 4.9 [4.1, 5.7]                                    | 3620 [3020, 4220]                 | 0.79 [0.53, 1.05]                         | 1.07 [0.69, 1.45]                         | 1.27 [0.96, 1.58]                         |

Table 1. Summary statistics for spotted lanternfly fourth instar (N4) nymph aerial kinematics.

| <b>Specimen/substrate</b>      | <b><i>N</i></b> | <b><i>n</i><sub>total</sub> (n per specimen)</b> | <b>Fraction bouncing (%)</b> | <b><i>N</i><sub>bounce</sub></b> | <b><i>v</i><sub>imp</sub> (m/s)</b> | <b>bounce height (mm)</b> | <b><i>e</i><sub>col</sub> (%)</b> | <b>Pearson correlation coefficient; linear regression D.F., F statistic, p value</b> |
|--------------------------------|-----------------|--------------------------------------------------|------------------------------|----------------------------------|-------------------------------------|---------------------------|-----------------------------------|--------------------------------------------------------------------------------------|
| Live, voluntary release/ paper | 5               | 15 (2-5)                                         | 100                          | 1.07 [0.93, 1.21]                | 2.01 [1.91, 2.11]                   | 3.6 [2.5, 4.6]            | 98.3% [97.9, 98.8]                | 0.17; 13, 0.38, 0.55                                                                 |
| Live/paper                     | 5               | 31 (6-7)                                         | 93                           | 1.02 [0.88, 1.18]                | 1.67 [1.62, 1.71]                   | 4.7 [3.7, 5.6]            | 99.0% [98.8, 99.2]                | -0.22; 29, 1.5, 0.23                                                                 |
| Dead/spread, paper             | 5               | 28 (3-7)                                         | 90                           | 1.06 [0.85, 1.27]                | 1.66 [1.63, 1.69]                   | 6.6 [5.0, 8.1]            | 95.5% [94.5, 96.5]                | 0.023; 26, 0.014, 0.91                                                               |
| Dead/tucked, paper             | 5               | 39 (5-9)                                         | 93                           | 0.78 [0.64, 0.91]                | 1.72 [1.68, 1.76]                   | 8.5 [7.5, 9.5]            | 94.4% [93.8, 95.1]                | 0.42; 37, 8.1, 0.007                                                                 |
| Live/ leaflet*                 | 8               | 20* (1-5)                                        | 71                           | 1.05 [0.89, 1.21]                | 1.76 [1.71, 1.82]                   | 4.2 [3.2, 5.2]            | 97.3% [96.8, 97.9]                | 0.36; 18, 2.6, 0.12                                                                  |

Table 2. Summary statistics for spotted lanternfly fourth instar (N4) nymphs impact and post-impact (bouncing) kinematics. (*N* = number of specimens; *n*<sub>total</sub> = total number of trials; *N*<sub>bounce</sub> = number of bounces during landing; *v*<sub>imp</sub> = speed immediately before impact; *e*<sub>c</sub> = collisional energy loss). \* Only trials in which the nymph landed successfully were analyzed for landing on leaves.
